# Supplementary material for: Pervasive correlations between causal disease effects of proximal SNPs vary with functional annotations and implicate stabilizing selection
Source: PubMed Central journal article supplement (PMC10723494; doi:10.1101/2023.12.04.23299391), 2023-12-04
Supplement: NIHPP2023.12.04.23299391v1-supplement-2.pdf [file NIHPP2023.12.04.23299391v1-supplement-2.pdf]

## Supplementary Note

### 1 Proofs and derivations

#### 1.1 Derivation of the regression equation

Regression equation:

$$\mathbb{E}[Z_i^2] = \sum_{c=1}^C Nl(i, c)\tau_c + \sum_{k=1}^K Nd(i, k)\omega_k + r_{ii}\sigma_e^2, \quad (1)$$

where  $l(i, c) = \sum_{j=1}^M a_c(j)r_{ij}^2$  and  $d(i, k) = \sum_{j=1}^M \sum_{j'=1}^M G_k(j, j')r_{ij}r_{ij'}$ .

*Proof.* Let  $\mathbf{X}_i = [X_{1i}, \dots, X_{Ni}]^T$  be the  $i$ -th column of  $\mathbf{X}$ . The summary association statistic for SNP  $i$  satisfies

$$Z_i^2 = \frac{1}{N} \left( \sum_{n=1}^N y_n X_{ni} \right)^2 = \frac{1}{N} (\mathbf{X}_i^T \mathbf{y})^2 = \frac{1}{N} [\mathbf{X}_i^T (\mathbf{X}\boldsymbol{\beta} + \mathbf{e})]^2 = \frac{1}{N} (\mathbf{X}_i^T \mathbf{X}\boldsymbol{\beta} + \mathbf{X}_i^T \mathbf{e})^2. \quad (2)$$

Next, the expectation of  $Z_i^2$  can be written as

$$\mathbb{E}[Z_i^2] = \mathbb{E} \left[ \frac{1}{N} (\mathbf{X}_i^T \mathbf{X}\boldsymbol{\beta} + \mathbf{X}_i^T \mathbf{e})^2 \right] \quad (3)$$

$$\stackrel{\boldsymbol{\beta}, \mathbf{e} \text{ indpt.}}{=} \mathbb{E} \left[ \frac{1}{N} (\mathbf{X}_i^T \mathbf{X}\boldsymbol{\beta})^2 + \frac{1}{N} (\mathbf{X}_i^T \mathbf{e})^2 \right] \quad (4)$$

$$= \mathbb{E} \left[ \frac{1}{N} \mathbf{X}_i^T \mathbf{X}\boldsymbol{\beta}\boldsymbol{\beta}^T \mathbf{X}_i + \frac{1}{N} \mathbf{X}_i^T \mathbf{e}\mathbf{e}^T \mathbf{X}_i \right] \quad (5)$$

$$\stackrel{\text{linearity of expectation}}{=} \frac{1}{N} \mathbf{X}_i^T \mathbf{X}\mathbb{E}[\boldsymbol{\beta}\boldsymbol{\beta}^T] \mathbf{X}_i + \frac{1}{N} \mathbf{X}_i^T \mathbb{E}[\mathbf{e}\mathbf{e}^T] \mathbf{X}_i \quad (6)$$

$$\stackrel{\text{Eq. (3)}}{=} \frac{1}{N} \mathbf{X}_i^T \mathbf{X}\boldsymbol{\Sigma}\mathbf{X}_i + \frac{1}{N} \mathbf{X}_i^T \mathbf{X}_i \sigma_e^2. \quad (7)$$

Let  $\mathbf{r}_i = \frac{1}{N} \mathbf{X}_i^T \mathbf{X}_i = [r_{i1}, \dots, r_{iM}]^T$  be the signed LD between SNP  $i$  and other SNPs. We have

$$\mathbb{E}[Z_i^2] = N\mathbf{r}_i^T \boldsymbol{\Sigma} \mathbf{r}_i + r_{ii}\sigma_e^2. \quad (8)$$

Define the vector form of single-SNP annotation  $\mathbf{a}_c = [a_c(1), \dots, a_c(M)]^T$  and the matrix form of SNP-pair annotation  $\mathbf{G}_k : [\mathbf{G}_k]_{ij} = G_k(i, j)$ . Taking Eq. (4) into the above equation to have

$$\mathbb{E}[Z_i^2] = N\mathbf{r}_i^T \left( \sum_{c=1}^C \text{diag}(\mathbf{a}_c)\tau_c + \sum_{k=1}^K \mathbf{G}_k \omega_k \right) \mathbf{r}_i + r_{ii}\sigma_e^2 \quad (9)$$

$$= \sum_{c=1}^C N\mathbf{r}_i^T \text{diag}(\mathbf{a}_c)\mathbf{r}_i \tau_c + \sum_{k=1}^K N\mathbf{r}_i^T \mathbf{G}_k \mathbf{r}_i \omega_k + r_{ii}\sigma_e^2 \quad (10)$$

$$= \sum_{c=1}^C N \left( \sum_{j=1}^M a_c(j)r_{ij}^2 \right) \tau_c + \sum_{k=1}^K N \left( \sum_{j=1}^M \sum_{j'=1}^M G_k(j, j')r_{ij}r_{ij'} \right) \omega_k + r_{ii}\sigma_e^2 \quad (11)$$

$$= \sum_{c=1}^C Nl(i, c)\tau_c + \sum_{k=1}^K Nd(i, k)\omega_k + r_{ii}\sigma_e^2 \quad (12)$$

□

#### 1.2 Derivation of heritability

Heritability for binary single-SNP annotation  $c$ :

$$h^2(c) = \frac{1}{N} \sum_{n=1}^N \text{Var} \left[ \sum_{i \in a_c} X_{ni} \beta_i \right] = \sum_{i \in a_c} \sum_{c'=1}^C a_{c'}(i)\tau_{c'} + \sum_{i \in a_c} \sum_{j \in a_c} \sum_{k'=1}^K G_{k'}(i, j)r_{ij}\omega_{k'}. \quad (13)$$

*Proof.* Let  $\mathbf{X}_n = [X_{n1}, \dots, X_{nM}]^T$  be the  $n$ -th row of  $\mathbf{X}$ . Let  $[\cdot]_{a_c}$  denote restricting the corresponding vector/matrix to elements in  $a_c$ .

$$h^2(c) = \frac{1}{N} \sum_{n=1}^N \text{Var} \left[ \sum_{i \in a_c} X_{ni} \beta_i \right] \quad (14)$$

$$= \frac{1}{N} \sum_{n=1}^N \text{Var} \left[ [\mathbf{X}_n]_{a_c}^T [\boldsymbol{\beta}]_{a_c} \right] \quad (15)$$

$$\stackrel{[\mathbf{X}_n]_{a_c}^T [\boldsymbol{\beta}]_{a_c} \text{ is zero-mean}}{=} \frac{1}{N} \sum_{n=1}^N \mathbb{E} \left[ [\mathbf{X}_n]_{a_c}^T [\boldsymbol{\beta}]_{a_c} [\boldsymbol{\beta}]_{a_c}^T [\mathbf{X}_n]_{a_c} \right] \quad (16)$$

$$= \frac{1}{N} \sum_{n=1}^N [\mathbf{X}_n]_{a_c}^T \mathbb{E} \left[ [\boldsymbol{\beta}]_{a_c} [\boldsymbol{\beta}]_{a_c}^T \right] [\mathbf{X}_n]_{a_c} \quad (17)$$

$$= \frac{1}{N} \sum_{n=1}^N [\mathbf{X}_n]_{a_c}^T [\boldsymbol{\Sigma}]_{a_c} [\mathbf{X}_n]_{a_c} \quad (18)$$

$$= \frac{1}{N} \sum_{n=1}^N \text{tr} \left( [\mathbf{X}_n]_{a_c}^T [\boldsymbol{\Sigma}]_{a_c} [\mathbf{X}_n]_{a_c} \right) \quad (19)$$

$$\stackrel{\text{cyclic property of trace}}{=} \frac{1}{N} \sum_{n=1}^N \text{tr} \left( [\boldsymbol{\Sigma}]_{a_c} [\mathbf{X}_n]_{a_c} [\mathbf{X}_n]_{a_c}^T \right) \quad (20)$$

$$\stackrel{\text{linearity of trace}}{=} \text{tr} \left( \frac{1}{N} \sum_{n=1}^N [\boldsymbol{\Sigma}]_{a_c} [\mathbf{X}_n]_{a_c} [\mathbf{X}_n]_{a_c}^T \right) \quad (21)$$

$$\stackrel{\text{linearity of dot product}}{=} \text{tr} \left( [\boldsymbol{\Sigma}]_{a_c} \left( \frac{1}{N} \sum_{n=1}^N [\mathbf{X}_n]_{a_c} [\mathbf{X}_n]_{a_c}^T \right) \right) \quad (22)$$

$$= \text{tr} \left( [\boldsymbol{\Sigma}]_{a_c} [\mathbf{R}]_{a_c} \right), \quad (23)$$

where for the last equation, we note that  $\frac{1}{N} \sum_{n=1}^N \mathbf{X}_n \mathbf{X}_n^T = \mathbf{R}$ , the LD matrix whose  $ij$ -th element is equal to  $r_{ij}$ .

Define the vector form of single-SNP annotation  $\mathbf{a}_c = [a_c(1), \dots, a_c(M)]^T$  and the matrix form of SNP-pair annotation  $\mathbf{G}_k : [\mathbf{G}_k]_{ij} = G_k(i, j)$ . Furthermore,

$$h^2(c) = \text{tr} \left( [\boldsymbol{\Sigma}]_{a_c} [\mathbf{R}]_{a_c} \right) \quad (24)$$

$$\stackrel{\boldsymbol{\Sigma} \text{ is symmetric}}{=} \text{tr} \left( [\boldsymbol{\Sigma}]_{a_c}^T [\mathbf{R}]_{a_c} \right) \quad (25)$$

$$\stackrel{\text{Eq. (4)}}{=} \text{tr} \left( \left[ \sum_{c'=1}^C \text{diag}(\mathbf{a}_{c'}) \tau_{c'} + \sum_{k'=1}^K \mathbf{G}_{k'} \omega_{k'} \right]_{a_c}^T [\mathbf{R}]_{a_c} \right) \quad (26)$$

$$\stackrel{\text{linearity}}{=} \sum_{c'=1}^C \text{tr} \left( [\text{diag}(\mathbf{a}_{c'}) \tau_{c'}]_{a_c}^T [\mathbf{R}]_{a_c} \right) + \sum_{k'=1}^K \text{tr} \left( [\mathbf{G}_{k'} \omega_{k'}]_{a_c}^T [\mathbf{R}]_{a_c} \right) \quad (27)$$

$$\stackrel{r_{ii}=1}{=} \sum_{i \in a_c} \sum_{c'=1}^C a_{c'}(i) \tau_{c'} + \sum_{i \in a_c} \sum_{j \in a_c} \sum_{k'=1}^K G_{k'}(i, j) r_{ij} \omega_{k'} \quad (28)$$

□

## References

1. Hilary K Finucane, Brendan Bulik-Sullivan, Alexander Gusev, Gosia Trynka, Yakir Reshef, Po-Ru Loh, Verner Anttila, Han Xu, Chongzhi Zang, Kyle Farh, et al. Partitioning heritability by functional annotation using genome-wide association summary statistics. *Nature genetics*, 47(11):1228, 2015.

## Supplementary Tables

See Supplementary Excel file

**Supplementary Table 1. GWAS diseases and complex traits.** We report the name, identifier, indication of 29 independent traits, and number of samples for 70 diseases/traits analyzed in the paper. For each disease/trait, we also report estimates of heritability, heritability SE, and z-score for nonzero heritability from LDSPEC with the baseline-SP model.

See Supplementary Excel file

**Supplementary Table 2. Main single-SNP annotations.** We report the name, identifier, type, number of common SNPs ( $MAF \geq 5\%$ ), number of low-frequency SNPs ( $0.5\% \leq MAF < 5\%$ ), reference, source, and version of baseline model for main 45 single-SNP annotations in the baseline-SP model.

See Supplementary Excel file

**Supplementary Table 3. Single-SNP annotations in baseline-SP.** We report the name, type, and number of SNPs for the 165 single-SNP annotations in the baseline-SP model.

See Supplementary Excel file

**Supplementary Table 4. Main SNP-pair annotations.** We report the name, identifier, type, and description for 34 main SNP-pair annotations in the baseline-SP model. For each SNP-pair annotation, we also report number of SNP pairs and average distance (combined across common negative-LD, low-frequency negative-LD, common positive-LD, low-frequency positive-LD), and we report average LD (for common negative-LD, low-frequency negative-LD, common positive-LD, low-frequency positive-LD, separately).

See Supplementary Excel file

**Supplementary Table 5. SNP-pair annotations in baseline-SP.** We report the name and number of SNP pairs for the 136 SNP-pair annotations in the baseline-SP model.

See Supplementary Excel file

**Supplementary Table 6. Correlation of LD and directional LD scores.** We report the correlation across 14,820,648 SNPs between 165 single-SNP annotations and 136 SNP-pair annotations in the baseline-SP model.

See Supplementary Excel file

**Supplementary Table 7. Simulation parameters.** We report the simulation name, term, and values for all simulations performed in the paper. “h2g” denotes target SCV (may be different from heritability in causal simulations), “p\_causal” denotes proportion of causal SNPs, and “alpha” denotes the MAF-dependent genetic architecture, i.e., scaling the per-SNP heritability by  $[MAF(1 - MAF)]^{(1+\alpha)}$ .

See Supplementary Excel file

**Supplementary Table 8. Numerical results for null simulations in Figure 1a.** We report the annotation name, term, term identifier, and true value for all estimates across the 165 single-SNP annotations and 136 SNP-pair annotations in the baseline-SP model. For each term and each annotation, we report LDSPEC estimates aggregated across the 50 simulation replicates: jackknife SE ( $\sqrt{\frac{1}{50} \sum_{i=1}^{50} \text{JNSE}_i^2} / \sqrt{50}$ ), empirical mean (mean across 50 estimates), empirical SE (SD across 50 estimates divided by  $\sqrt{50}$ ), empirical p-value (assuming normal distribution), and empirical FWER ( $P < 0.05/165$  for single-SNP annotations and  $P < 0.05/136$  for SNP-pair annotations).

See Supplementary Excel file

**Supplementary Table 9. Numerical results for causal simulations in Figure 1b.** We report the annotation name, term, term identifier, and true value for all estimates across the 165 single-SNP annotations and 136 SNP-pair annotations in the baseline-SP model. For each term and each annotation, we report LDSPEC estimates aggregated across the 50 simulation replicates: jackknife SE ( $\sqrt{\frac{1}{50} \sum_{i=1}^{50} \text{JNSE}_i^2} / \sqrt{50}$ ), empirical mean (mean across 50 estimates), empirical SE (SD across 50 estimates divided by  $\sqrt{50}$ ), empirical p-value (assuming normal distribution), and empirical FWER ( $P < 0.05/165$  for single-SNP annotations and  $P < 0.05/136$  for SNP-pair annotations).

See Supplementary Excel file

**Supplementary Table 10. LDSPEC results for single-SNP annotations and 70 diseases/traits.** We report trait identifier, annotation identifier, annotation type, and number of SNPs for 165 single-SNP annotations. We report point estimates, SE, and p-values of  $\tau$ , heritability, SCV, heritability enrichment, and heritability shrinkage for 165 single-SNP annotations and 70 diseases/traits.

See Supplementary Excel file

**Supplementary Table 11. LDSPEC results for SNP-pair annotations and 70 diseases/traits.** We report trait identifier, annotation identifier, and number of SNP pairs for 136 SNP-pair annotations. We report point estimates, SE, and p-values of  $\omega$ , total SNP-pair effect covariance,  $\xi$ , total excess SNP-pair effect covariance, and  $\xi^*$  for 70 diseases/traits and 136 SNP-pair annotations.

See Supplementary Excel file

**Supplementary Table 12. Meta-analyzed LDSPEC results for single-SNP annotations.** We report meta-analyzed point estimates, SE, and p-values of  $\tau$ , heritability, SCV, heritability enrichment, and heritability shrinkage for 165 single-SNP annotations. The meta-analysis was performed across 29 independent diseases/traits.

See Supplementary Excel file

**Supplementary Table 13. Meta-analyzed LDSPEC results for SNP-pair annotations.** We report meta-analyzed point estimates, SE, and p-values of  $\omega$ , total SNP-pair effect covariance,  $\xi$ , total excess SNP-pair effect covariance, and  $\xi^*$  for 136 SNP-pair annotations. The meta-analysis was performed across 29 independent diseases/traits.

See Supplementary Excel file

**Supplementary Table 14. Numerical results for Figure 2.** We report annotation name,  $\xi$  estimate, SE of  $\xi$  estimate, p-value of  $\xi$  estimate, and FWER of  $\xi$  estimate for low-frequency negative-LD, common negative-LD, low-frequency positive-LD, and common positive-LD SNP-pair annotations in Figure 2, respectively.

See Supplementary Excel file

**Supplementary Table 15. Jackknife-estimated differences for comparisons in Figure 2.** We report annotation name, first stratum, second stratum, estimated difference, SE, p-value, and FWER for each comparison.

See Supplementary Excel file

**Supplementary Table 16. Numerical results for Figure 3.** We report annotation name,  $\xi^*$  estimate, SE of  $\xi^*$  estimate, p-value of  $\xi^*$  estimate, and FWER of  $\xi^*$  estimate for the 0-100bp and 0-1kb common positive-LD, low-frequency positive-LD, common negative-LD, and low-frequency negative-LD SNP-pair annotations, respectively.

See Supplementary Excel file

**Supplementary Table 17. Jackknife-estimated differences for comparisons in Figure 3.** We report annotation name, first stratum, second stratum, estimated difference, SE, p-value, and FWER for each comparison.

See Supplementary Excel file

**Supplementary Table 18. Numerical results for Figure 4.** We report the annotation name, heritability enrichment estimate, SE of heritability enrichment estimate,  $\xi^*$  estimate, and SE of  $\xi^*$  estimate for SNP-pair annotations in Figure 4.

See Supplementary Excel file

**Supplementary Table 19. Heterogeneity across traits.** We report the chi-square statistic, p-value, within-trait variance, between-trait variance, variance ratio (within over between), FWER (across 136 SNP-pair annotations tested), and FDR (across 136 SNP-pair annotations tested).

See Supplementary Excel file

**Supplementary Table 20. Numerical results for Figure 5.** We report the trait name, heritability estimate, SE of heritability estimate, SCV estimate, SE of SCV estimate, heritability shrinkage estimate, and SE of heritability shrinkage estimate for 70 diseases/traits.

See Supplementary Excel file

**Supplementary Table 21. Numerical results for Figure 6.** We report the distance bin, MAF bin, LD bin,  $\xi$  estimate, and SE of  $\xi$  estimate for SNP-pair categories in Figure 6.

## Supplementary Figures

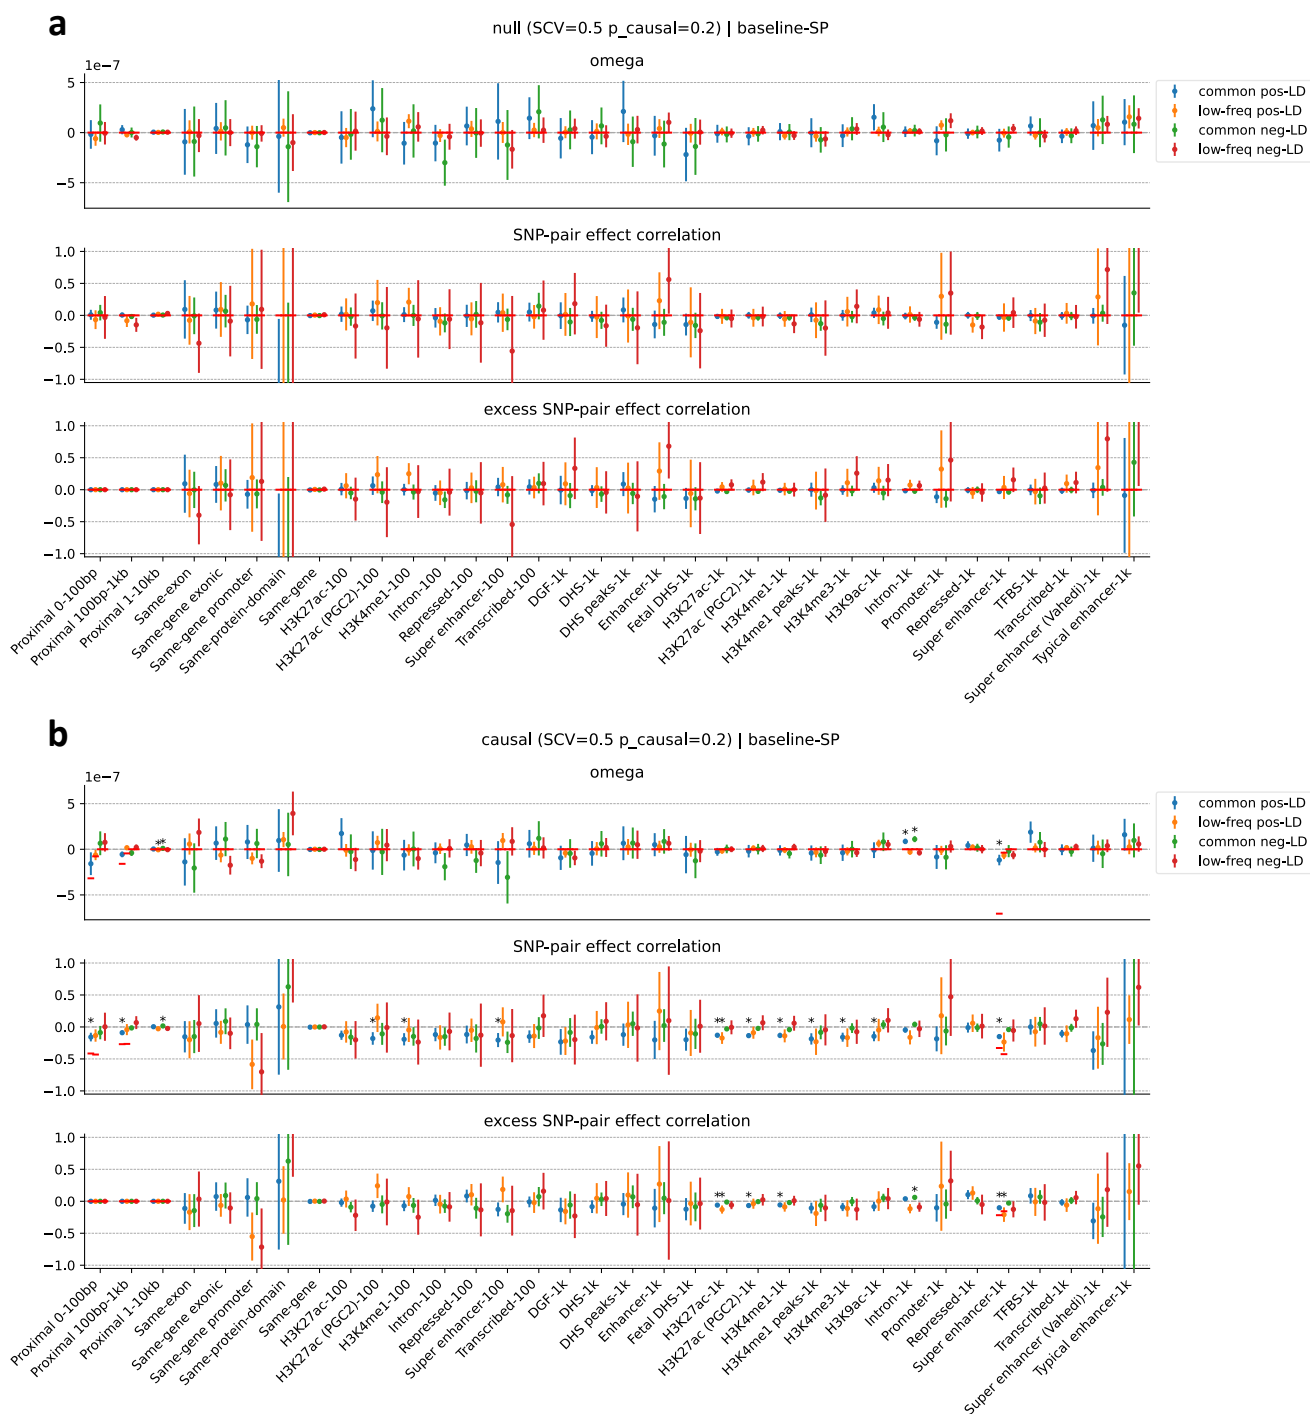

**Supplementary Figure 1. Additional results of estimates for SNP-pair annotations in null and causal simulations in Figure 1.** We report estimates of  $\omega$ ,  $\xi$ , and  $\xi^*$  for 136 SNP-pair annotations in the baseline-SP model. (a) for null simulations and (b) for causal simulations. Error bars denote 95% confidence intervals around the mean of 50 simulation replicates; “\*” denotes statistical significance after multiple testing correction ( $P < 0.05/136$ ). Red horizontal lines represent the true simulated values for SNP-pair annotations whose true values are available.



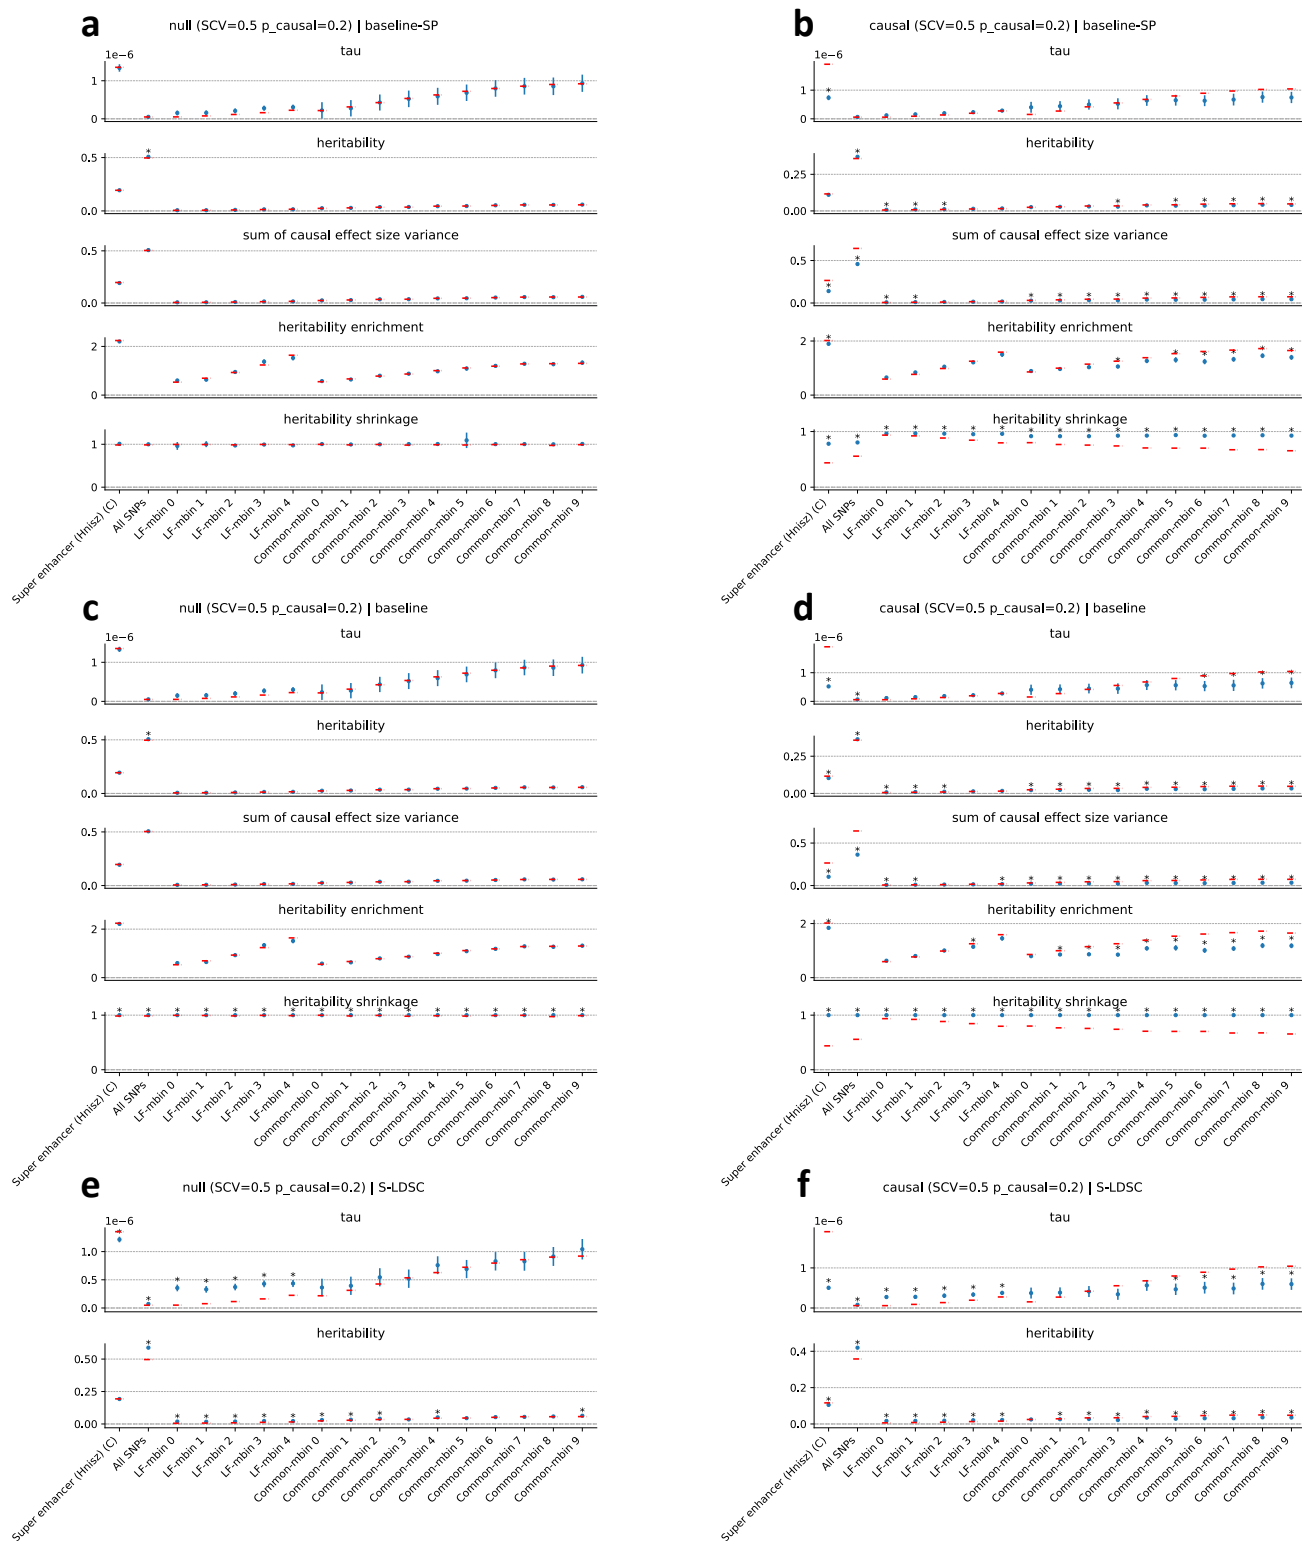

**Supplementary Figure 2. Additional results of estimates for single-SNP annotations in null and causal simulations in Figure 1.** We report estimates of  $\tau$ , heritability, SCV, heritability enrichment, and heritability shrinkage for 17 binary single-SNP annotations whose true values for all 5 terms are available. **(a)** for null simulations and **(b)** for causal simulations. We also report the corresponding estimates using LDSPEC + baseline (without SNP-pair annotations) in panels c,d, and corresponding estimates ( $\tau$  and heritability) using S-LDSC<sup>1</sup> + baseline (without SNP-pair annotations) in panels e,f. Error bars denote 95% confidence intervals around the mean of 50 simulation replicates; “\*” denotes statistically significantly different from the true values after multiple testing correction ( $P < 0.05/165$ ). Red horizontal lines represent the true values.

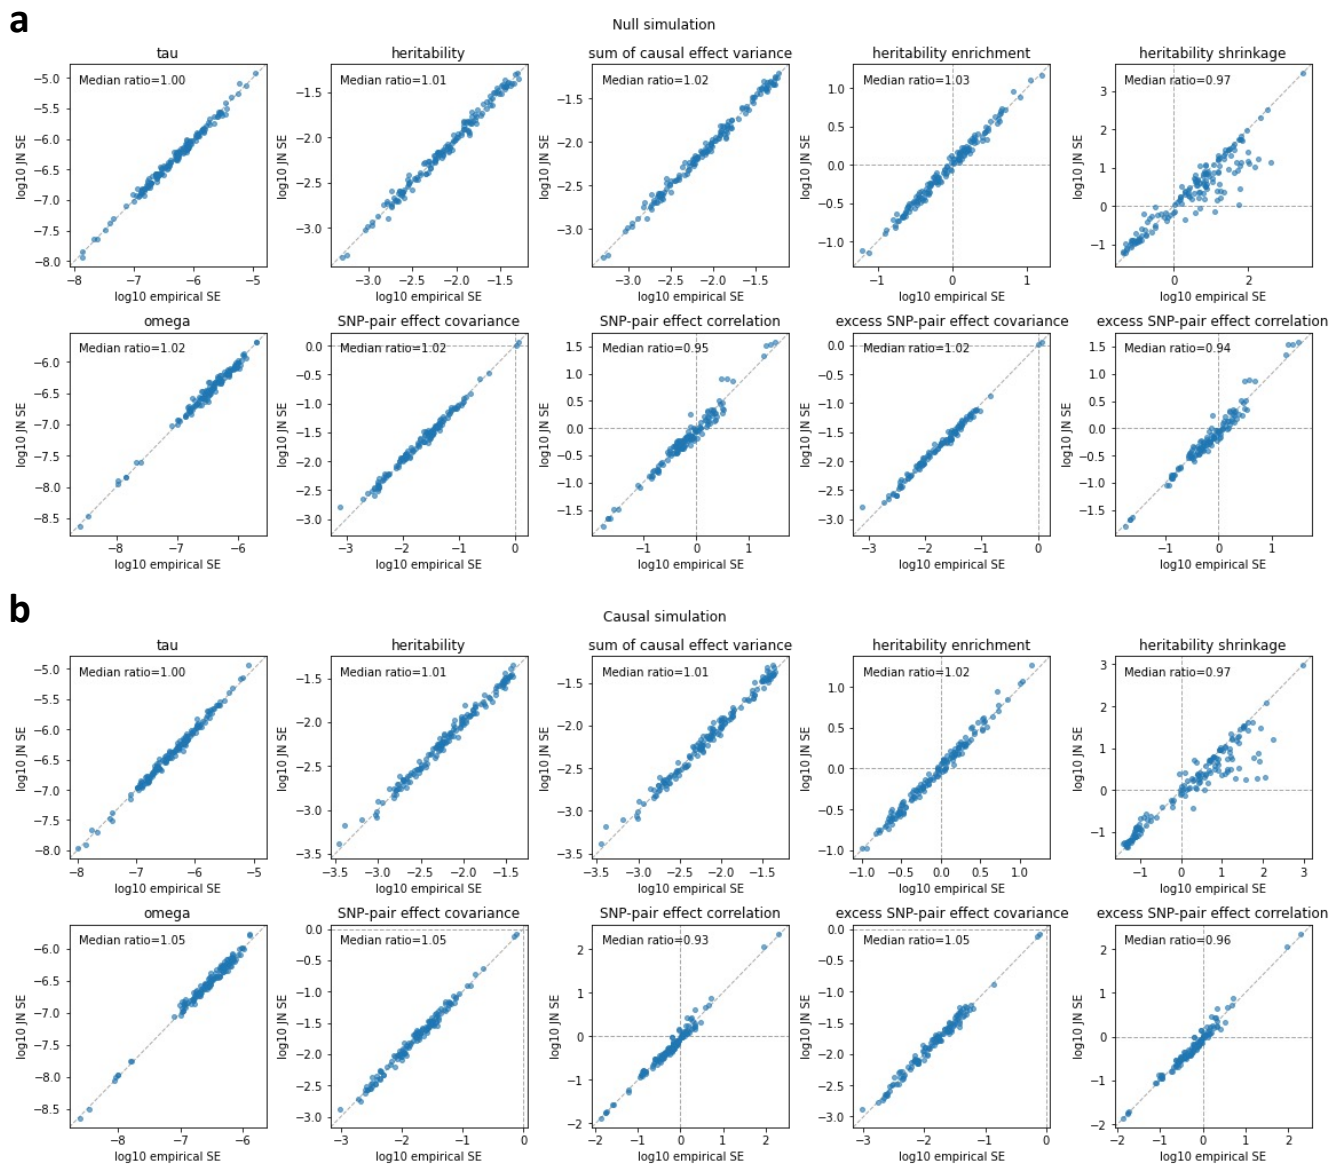

**Supplementary Figure 3. Calibration of CIs for null and causal simulations in Figure 1.** Results are shown for estimates of  $\tau$ , heritability, SCV, heritability enrichment, heritability shrinkage,  $\omega$ , SNP-pair effect covariance,  $\xi$ , excess SNP-pair effect covariance, and  $\xi^*$ , respectively. **(a)** for null simulations and **(b)** for causal simulations. Each point represents an annotation, x-axis represents the  $\log_{10}$  empirical SE (SD of estimates across simulation replicates), and y-axis represents the  $\log_{10}$  jackknife SE ( $\sqrt{\frac{1}{50} \sum_{i=1}^{50} \text{JNSE}_i^2}$ ). The median of ratios between jackknife SE and empirical SE across annotations is provided in the figure. We note that the p-value of  $\xi$  is based on estimates of SNP-pair effect covariance, and the p-value of  $\xi^*$  is based on estimates of excess SNP-pair effect covariance (Methods).

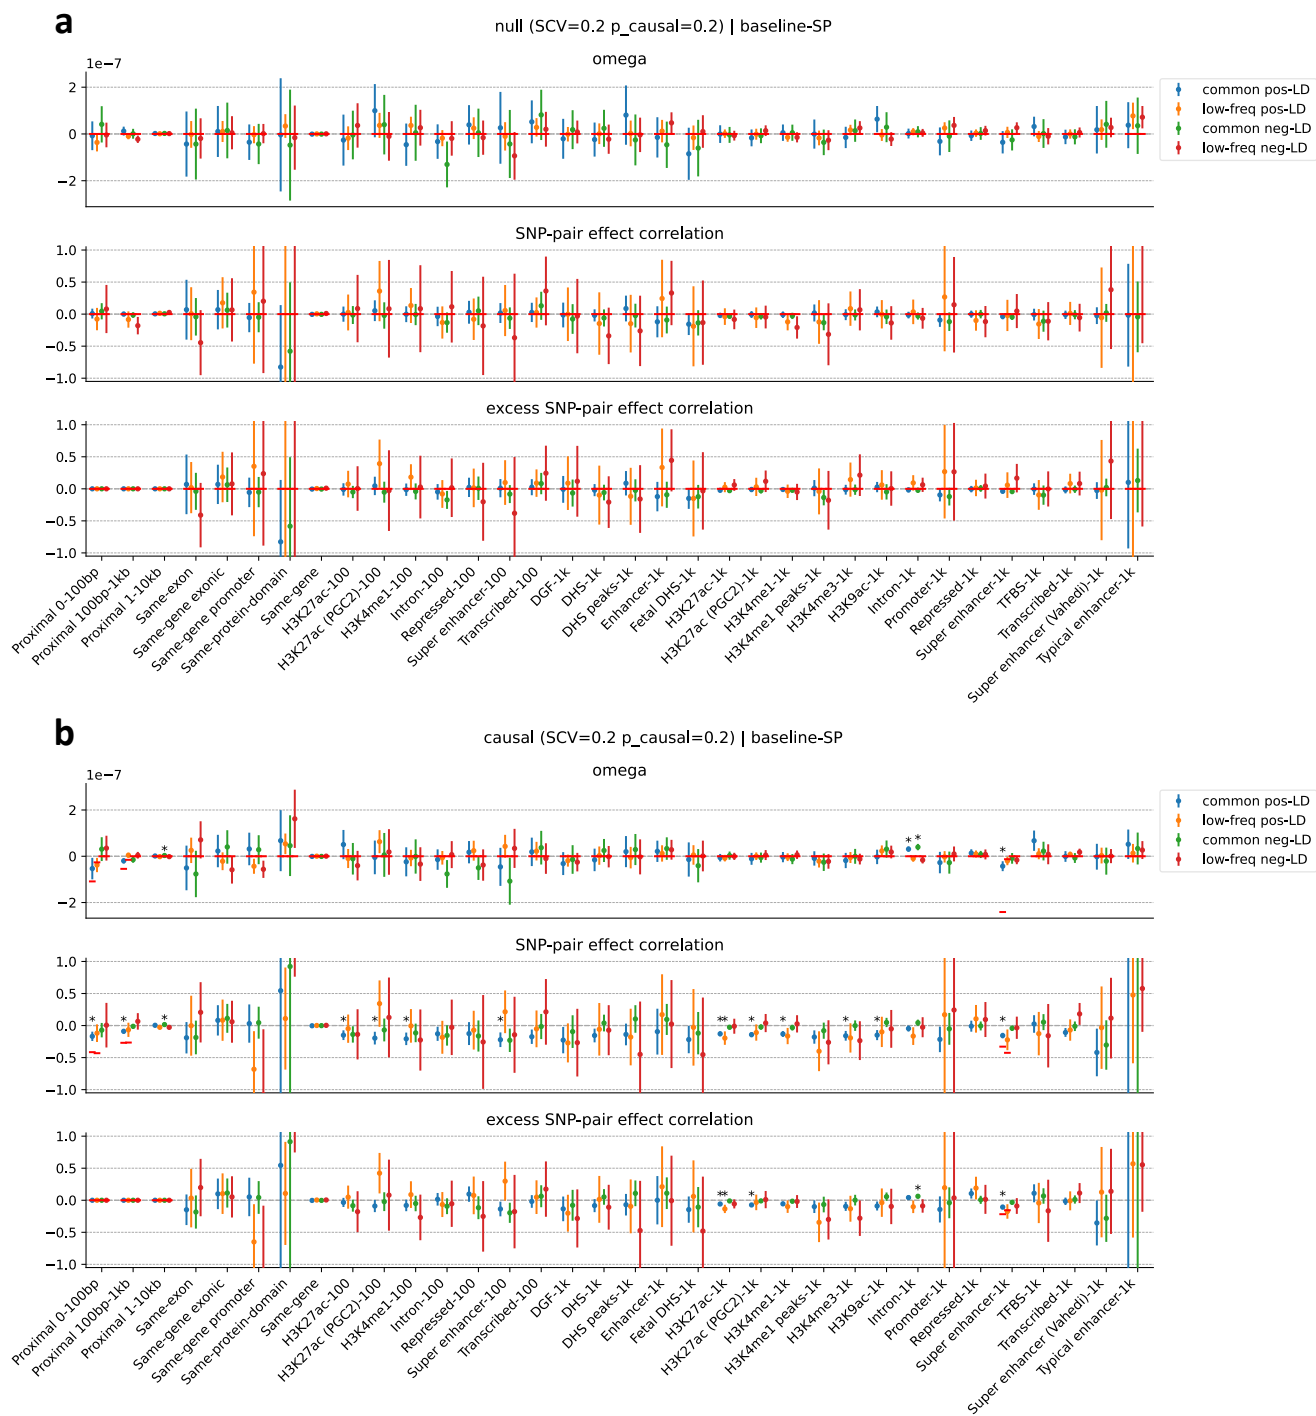

**Supplementary Figure 4. Null and causal simulations with a lower value of SCV. (a)** Null simulations with SCV of 0.2 (instead of 0.5) and causal SNP proportion of 0.2. **(b)** Causal simulations with SCV of 0.2 (instead of 0.5) and causal SNP proportion of 0.2. We report estimates of  $\omega$ ,  $\xi$ , and  $\xi^*$  for 136 SNP-pair annotations in the baseline-SP model. Error bars denote 95% confidence intervals around the mean of 50 simulation replicates; “\*” denotes statistical significance after multiple testing correction ( $P < 0.05/136$ ). Red horizontal lines represent the true simulated values for SNP-pair annotations whose true values are available.

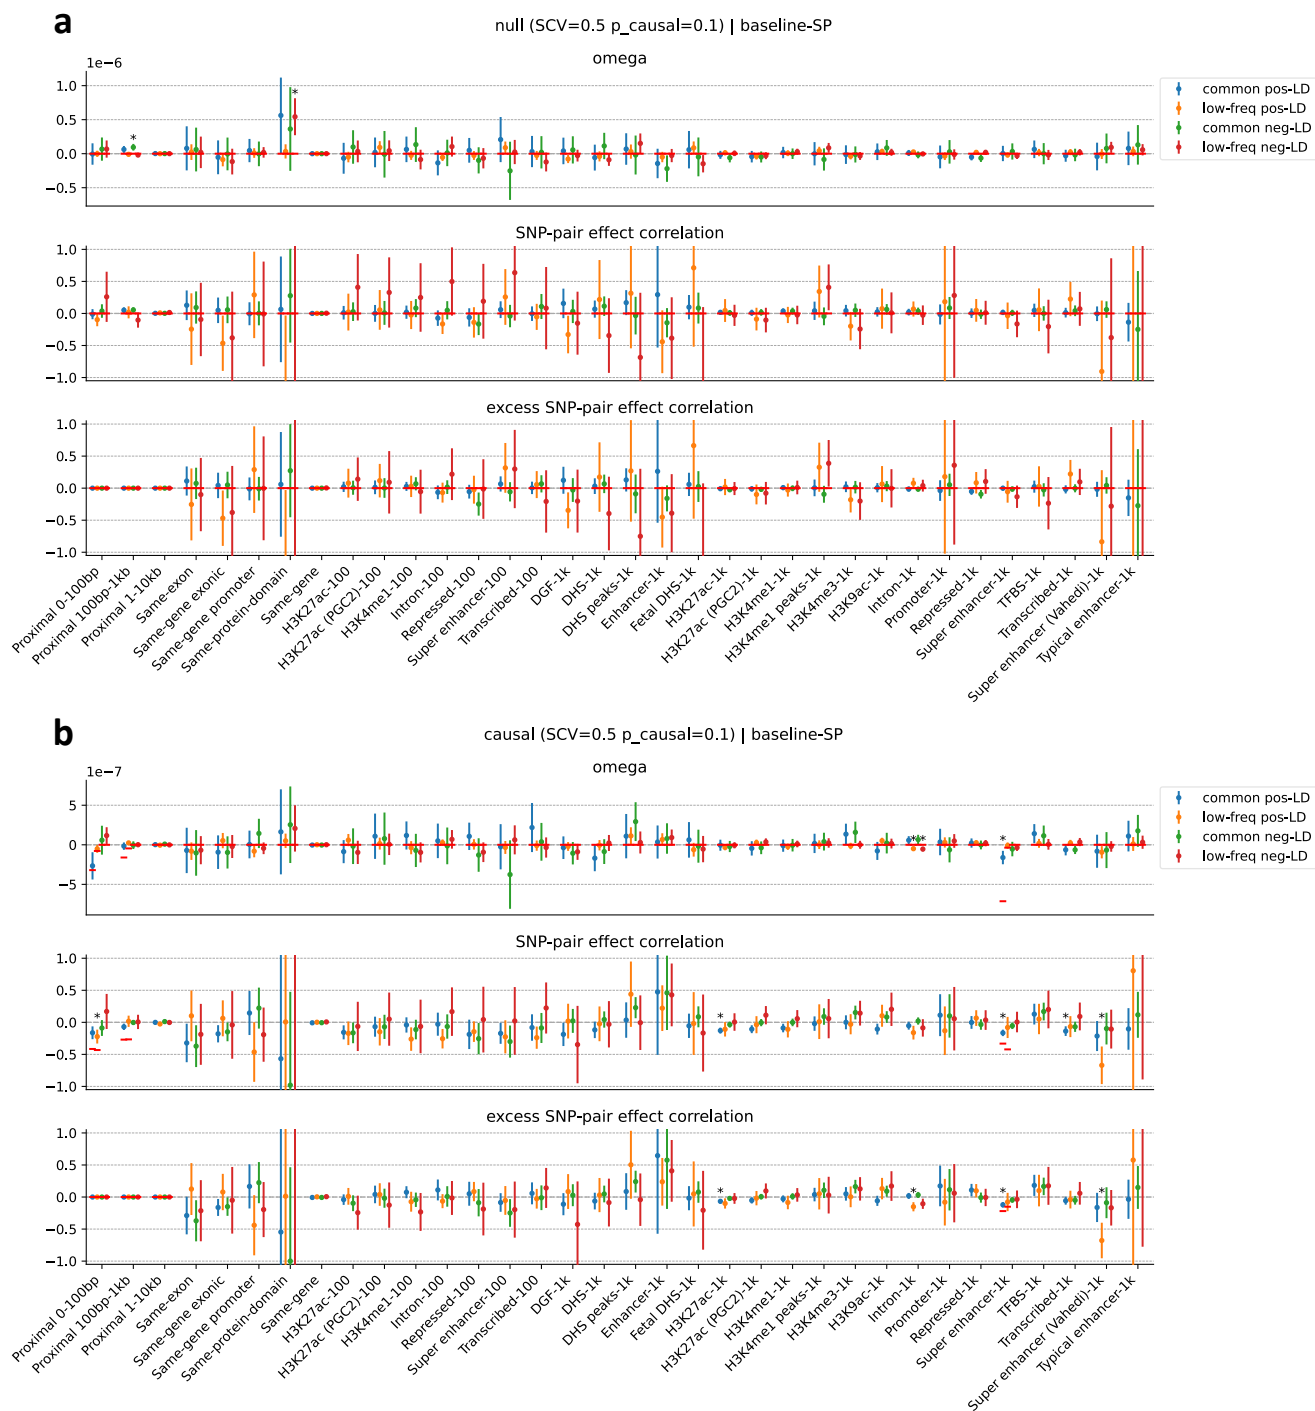

**Supplementary Figure 5. Null and causal simulations with a lower value of causal SNP proportion. (a)** Null simulations with SCV of 0.5 and causal SNP proportion of 0.1 (instead of 0.2). **(b)** Causal simulations with SCV of 0.5 and causal SNP proportion of 0.1 (instead of 0.2). We report estimates of  $\omega$ ,  $\xi$ , and  $\xi^*$  for 136 SNP-pair annotations in the baseline-SP model. Error bars denote 95% confidence intervals around the mean of 50 simulation replicates; “\*” denotes statistical significance after multiple testing correction ( $P < 0.05/136$ ). Red horizontal lines represent the true simulated values for SNP-pair annotations whose true values are available.

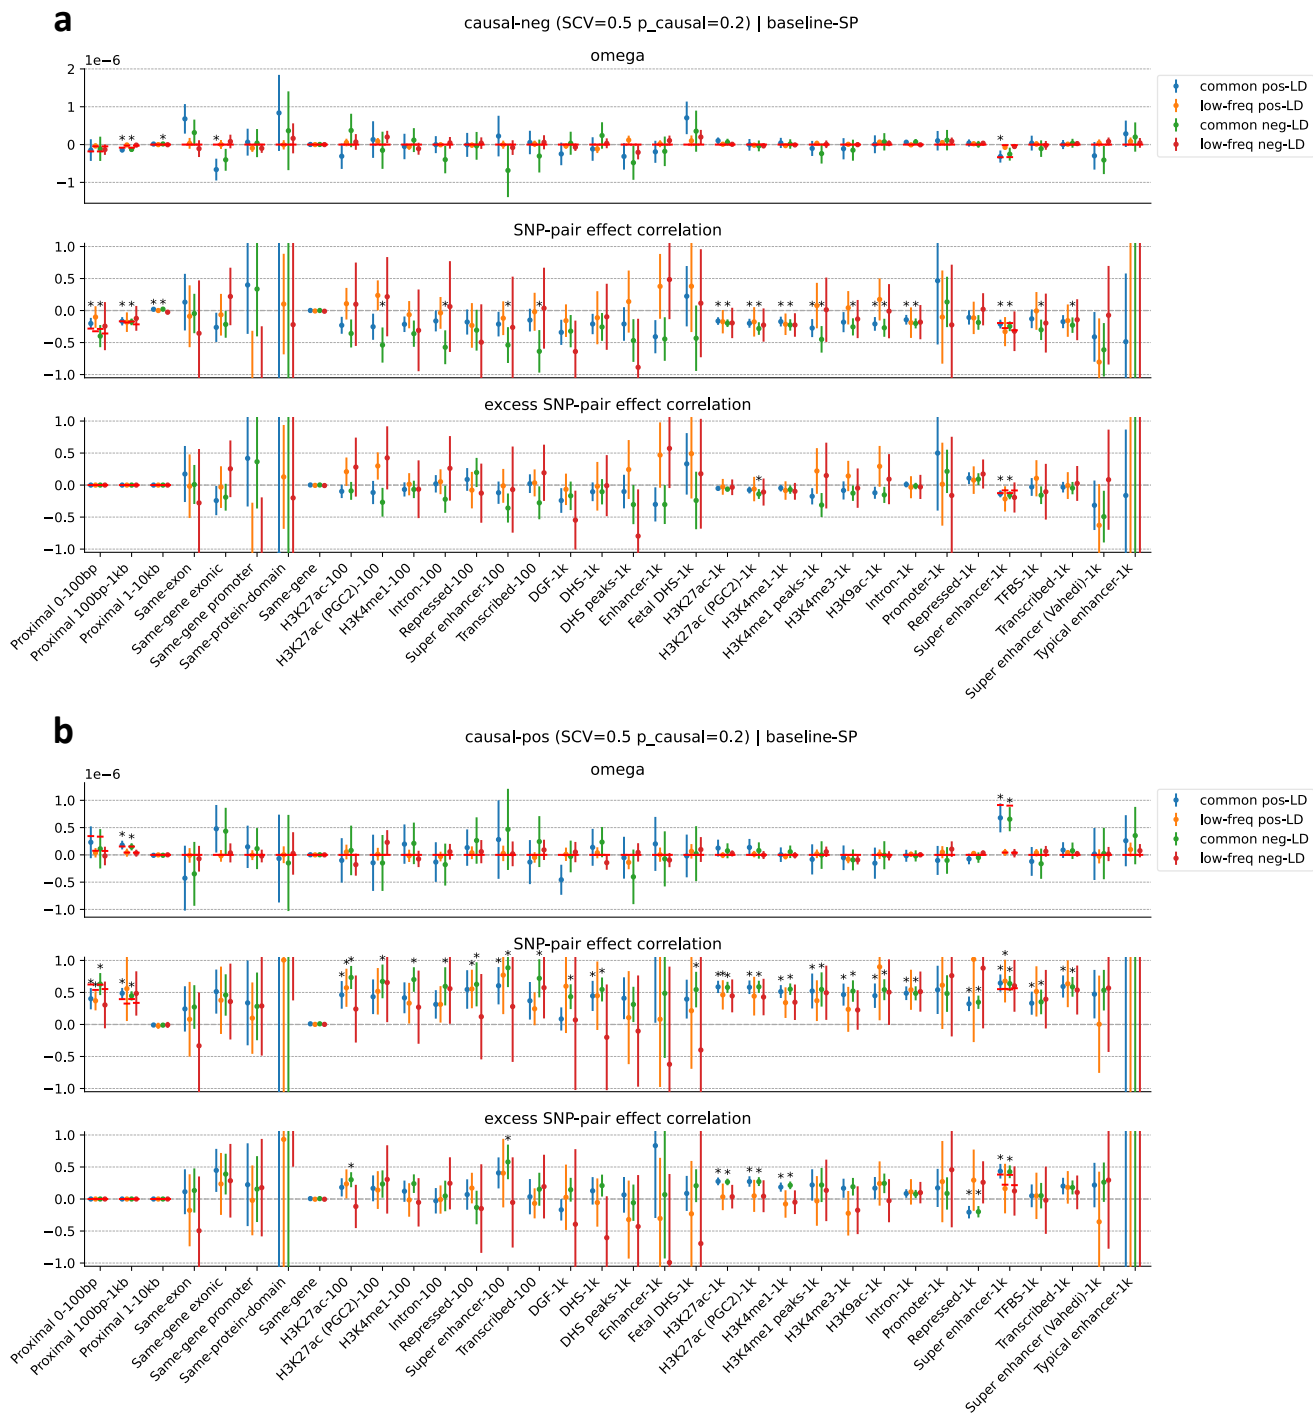

**Supplementary Figure 6. Non-LD-stratified causal simulations.** (a) Causal simulations with negative  $\omega$  for both positive-LD and negative-LD SNP-pair annotations (vs. negative  $\omega$  for only positive-LD SNP-pair annotations in primary simulations), SCV of 0.5, and causal SNP proportion of 0.2. (b) Causal simulations with positive  $\omega$  for both positive-LD and negative-LD SNP-pair annotations (vs. negative  $\omega$  for only positive-LD SNP-pair annotations in primary simulations), SCV of 0.5, and causal SNP proportion of 0.2. We report estimates of  $\omega$ ,  $\xi$ , and  $\xi^*$  for 136 SNP-pair annotations in the baseline-SP model. Error bars denote 95% confidence intervals around the mean of 50 simulation replicates; “\*” denotes statistical significance after multiple testing correction ( $P < 0.05/136$ ). Red horizontal lines represent the true values for SNP-pair annotations whose true values are available.

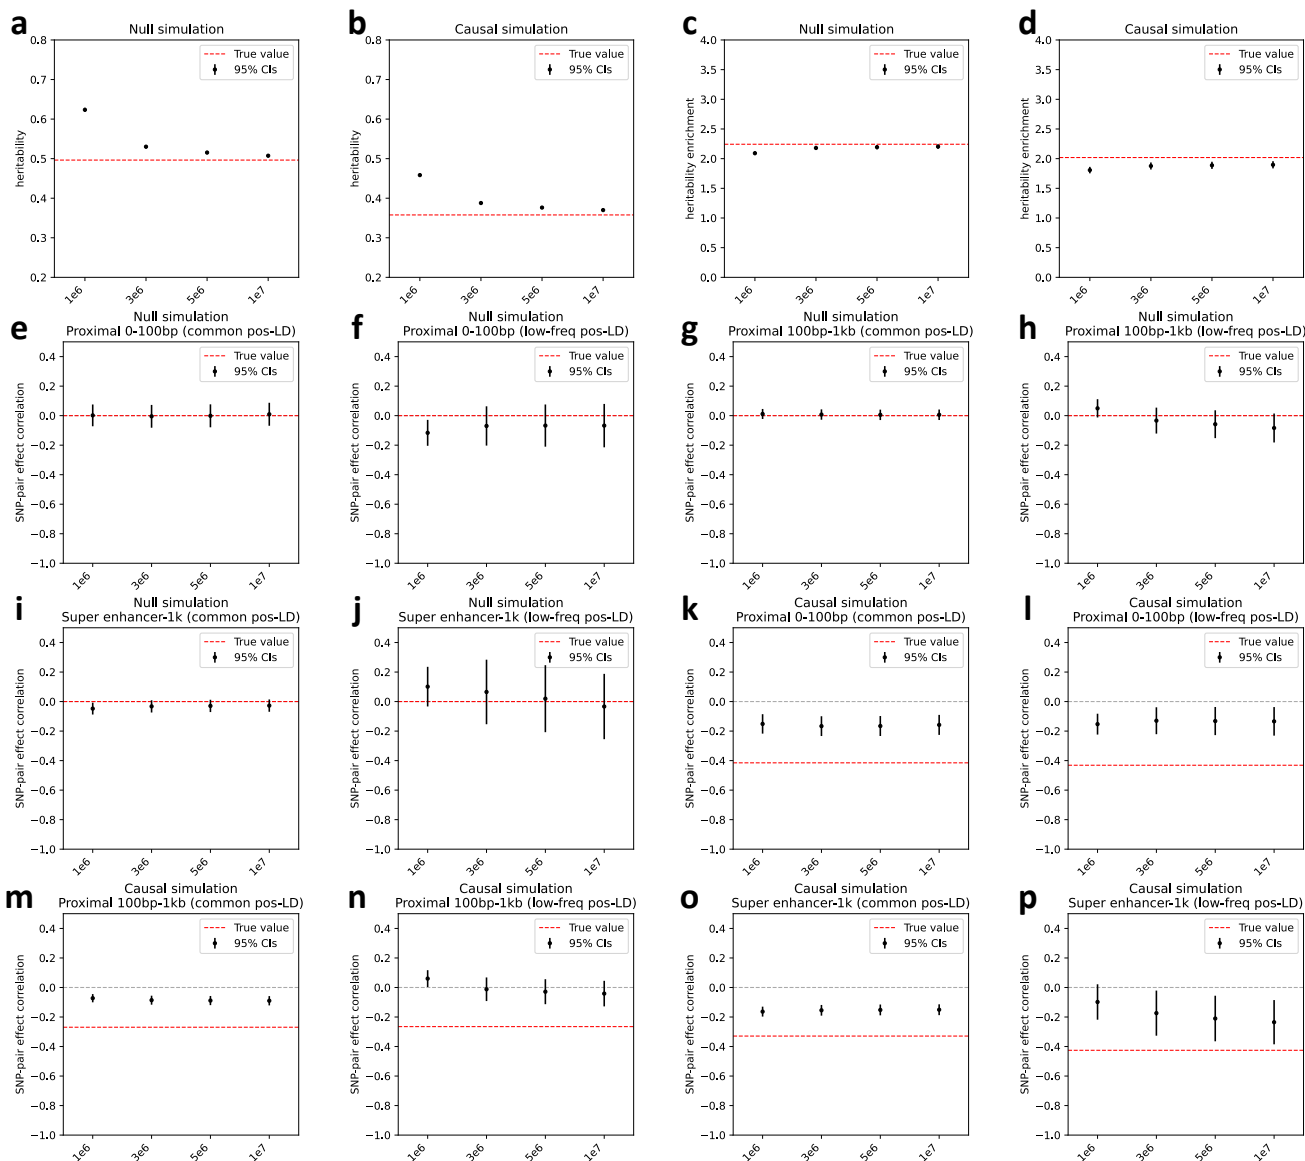

**Supplementary Figure 7. Results for applying LDSPEC to the primary null and causal simulation data with LD and directional LD scores computed with smaller window sizes.** We considered 3 smaller window sizes: 1Mb, 3Mb, 5Mb (instead of 10Mb). **(a-b)** Estimates of heritability in null and causal simulations. **(c-d)** Estimates of heritability enrichment for the common Super enhancer (Hnisz) annotation in null and causal simulations (simulated to have a positive  $\tau$  in both null and causal simulations). **(e-p)** Estimates of  $\xi$  in null and causal simulations for the 6 SNP-pair annotations simulated to have negative  $\omega$  in the causal simulation. Error bars denote 95% confidence intervals around the mean of 50 simulation replicates. Red horizontal lines represent the true simulated values.

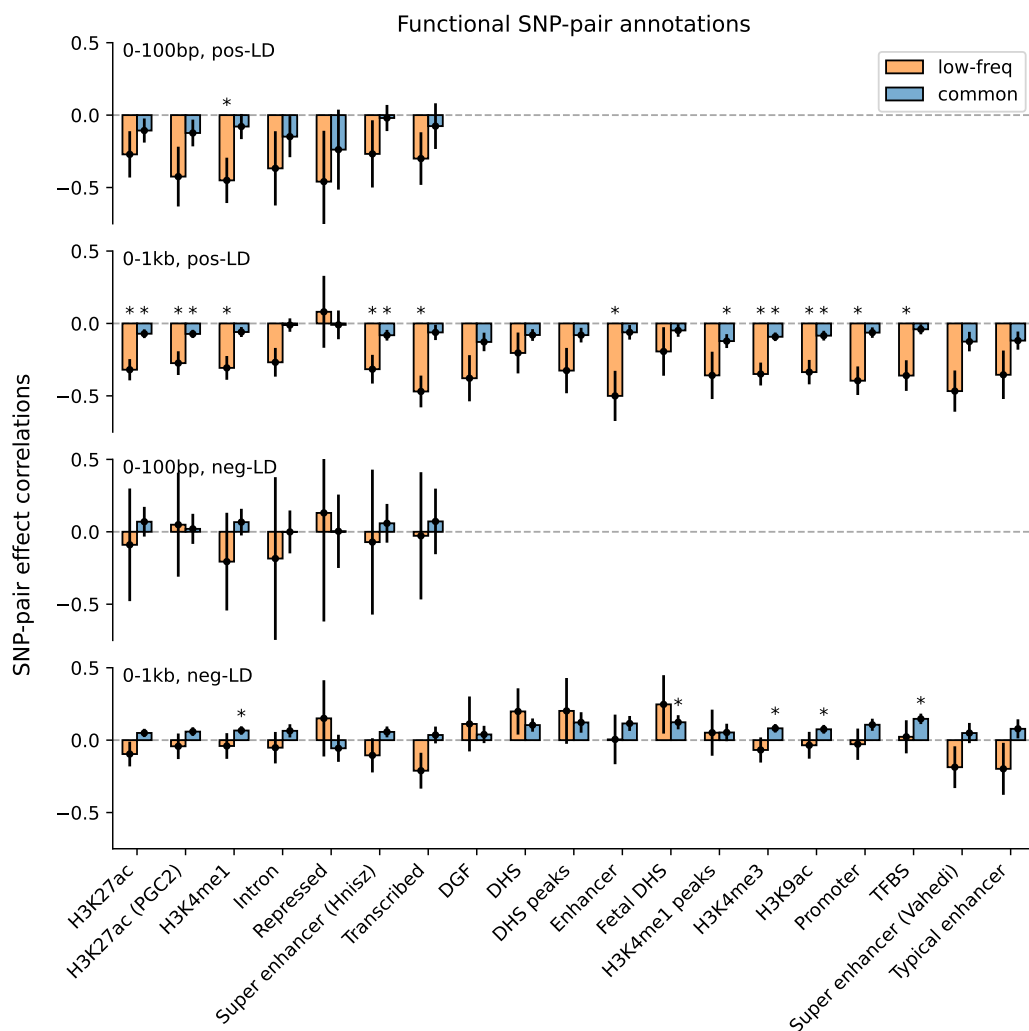

**Supplementary Figure 8. Estimates of SNP-pair effect correlation ( $\xi$ ) across 29 independent diseases and complex traits for functional SNP-pair annotations.** We report meta-analyzed  $\xi$  estimates across 29 independent diseases for 7 functional 0-100bp and 19 functional 0-1kb SNP-pair annotations. Results are shown for the positive-LD 0-100bp, positive-LD 0-1kb, negative-LD 0-100bp, and negative-LD 0-1kb SNP-pair annotations in the 4 panels, respectively, and are stratified by MAF in each panel. Error bars denote 95% confidence intervals. “\*” denotes statistical significance after multiple testing correction across estimates on the figure ( $P < 0.05/136$ ).

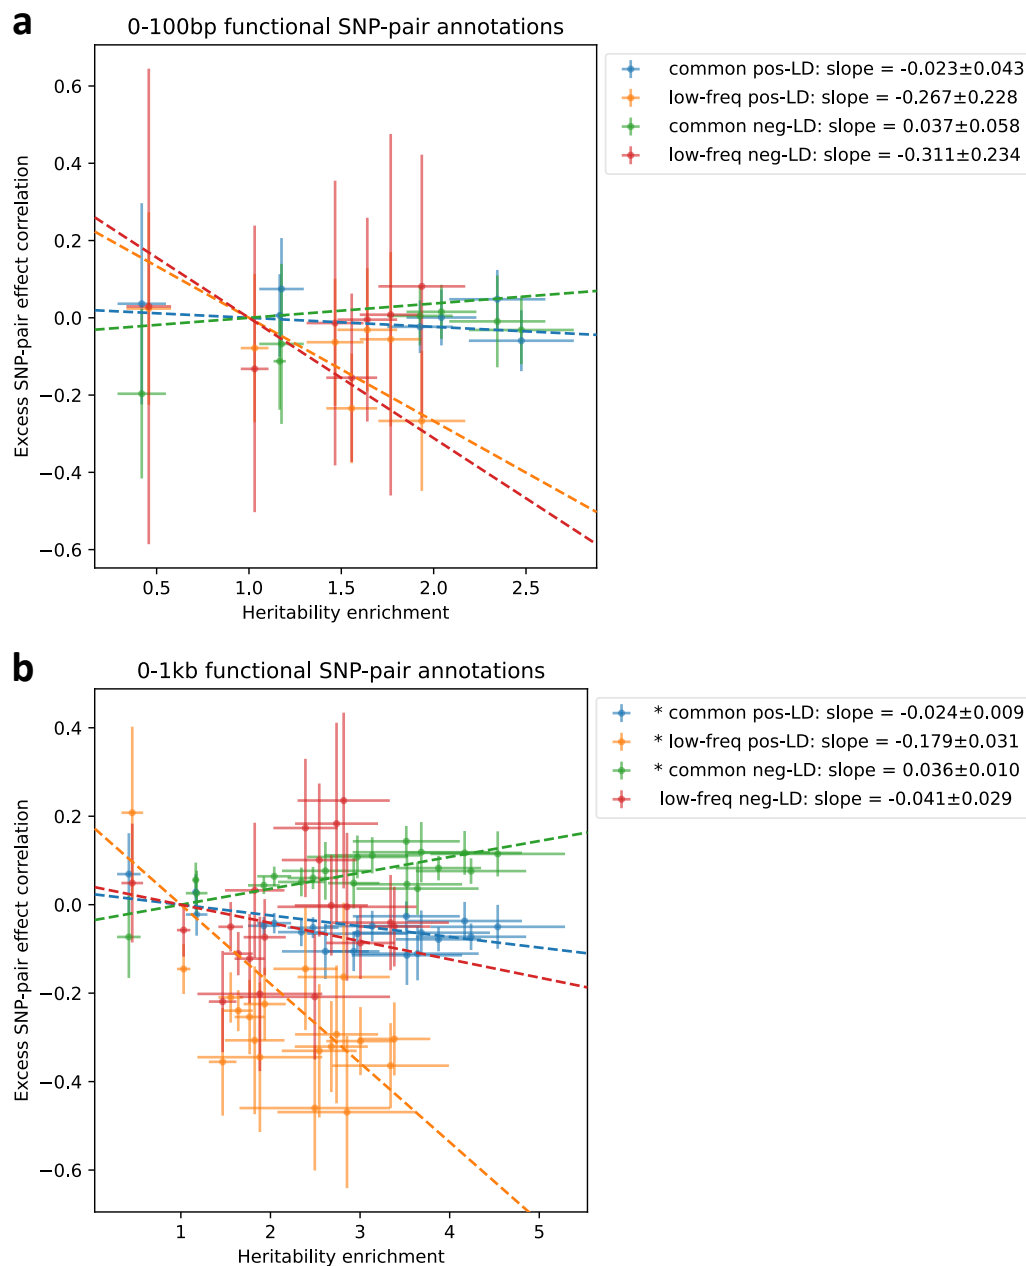

**Supplementary Figure 9. Comparison between estimates of heritability enrichment and estimates of excess SNP-pair effect correlation estimate ( $\xi^*$ ) across functional SNP-pair annotations.** Panels a and b show results for functional 0-100bp and functional 0-1kb SNP-pair annotations, respectively. Each dot represents a SNP-pair annotation, x-axis represents the meta-analyzed estimate of heritability enrichment, and y-axis represents the meta-analyzed estimate of  $\xi^*$  (across 29 independent diseases/traits). In each panel, results are shown for the common positive-LD, low-frequency positive-LD, common negative-LD, and low-frequency positive-LD SNP-pair annotations separately. Error bars denote 95% confidence intervals. Regression slopes are provided with SEs in the figure legend; “\*” denotes statistical significance after multiple testing correction ( $P < 0.05/4$ ).



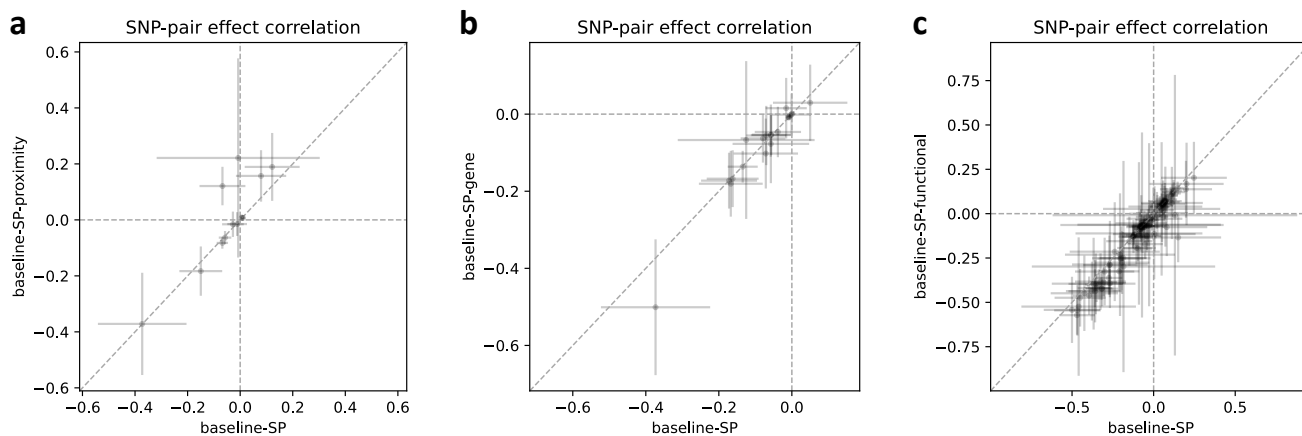

**Supplementary Figure 10. Comparison of  $\xi$  estimates of LDSPEC with alternative heritability models. (a)**

Comparison of meta-analyzed  $\xi$  estimates between the baseline-SP model (x-axis) and the baseline-SP-proximity model for 12 proximity-based SNP-pair annotations shared between the two models. **(b)** Comparison of meta-analyzed  $\xi$  estimates between the baseline-SP model (x-axis) and the baseline-SP-gene model for 20 gene-based SNP-pair annotations shared between the two models. **(c)** Comparison of meta-analyzed  $\xi$  estimates between the baseline-SP model (x-axis) and the baseline-SP-functional model for 104 functional SNP-pair annotations shared between the two models. Each dot represents a SNP-pair annotation. No difference between the x-value and y-value is statistically significant ( $P > 0.05/136$ ).

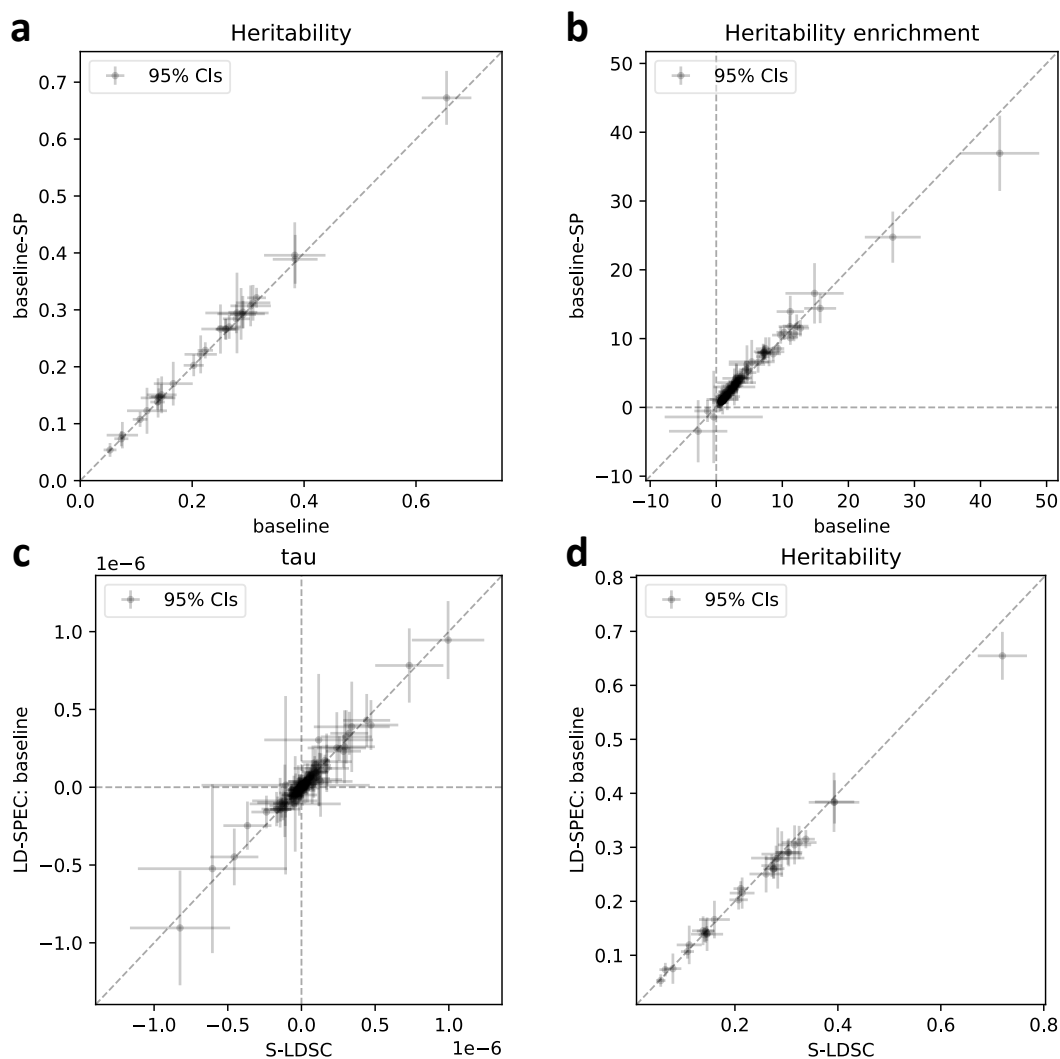

**Supplementary Figure 11. Comparison of estimates for single-SNP annotations.** (a) Comparison of heritability estimates using LDSPEC with the baseline model (x-axis) and the baseline-SP model (y-axis) for 29 independent diseases/traits. (b) Comparison of meta-analyzed heritability enrichment estimates using LDSPEC with the baseline model (x-axis) and the baseline-SP model (y-axis) for 165 single-SNP annotations. (c) Comparison of meta-analyzed  $\tau$  estimates between S-LDSC<sup>1</sup> (x-axis) and LDSPEC (y-axis) (both using the baseline model) for 165 single-SNP annotations. (d) Comparison of heritability estimates between S-LDSC<sup>1</sup> (x-axis) and LDSPEC (y-axis) (both using the baseline model) for 29 independent diseases/traits. No difference between the x-value and y-value is statistically significant ( $P > 0.05/29$  for panels a,d,  $P > 0.05/165$  for panels b,c).

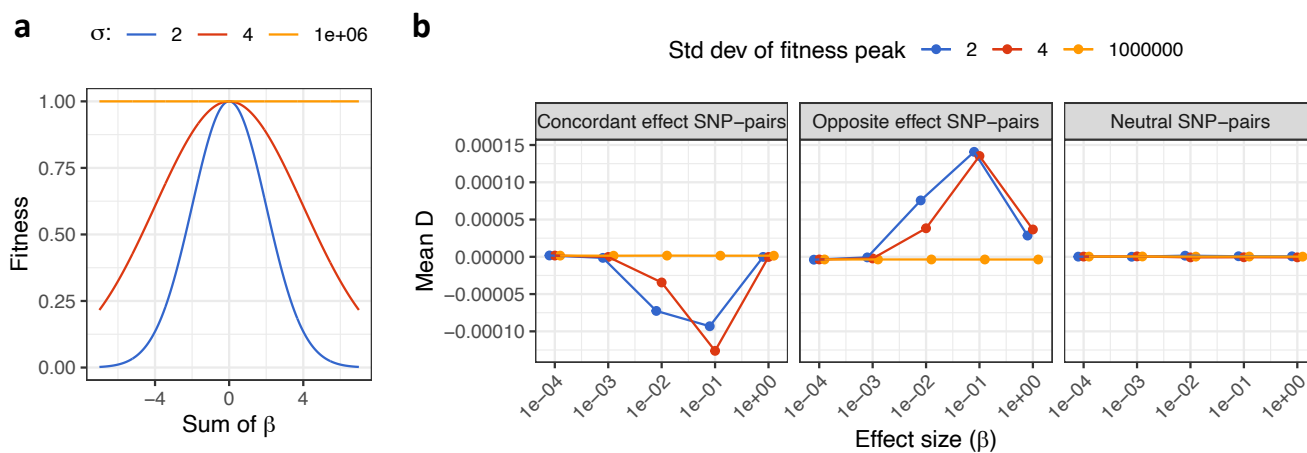

**Supplementary Figure 12. Additional results for forward evolutionary simulations.** (a) Fitness as a function of sum of causal effects (aggregate SNP effect on trait) under a stabilizing selection model. The 3 curves correspond to strong selection (width  $\sigma = 2$ ), moderate selection (width  $\sigma = 4$ ), and no selection (width  $\sigma = 1 \times 10^6$ ). (b) LD measured by  $D$  as a function of effect size ( $\beta$ ) for concordant-effect SNP pairs (left), opposite-effect SNP pairs (middle), and neutral SNP pairs (right, at least one zero-effect SNP in the SNP pair). Error bars denote 95% CIs.
